# Supplementary material for: Vibrio cholerae’s ToxRS bile sensing system
Source: eLife journal article supplement (doi:10.7554/elife.88721), 2023-09-28
Supplement: fig4-data1 [file elife-88721-fig4-data1-v2.zip]

## RedShift AQS<sup>3</sup> delta Analytics Results

Report Date: Friday, May 5, 2023 9:11:10 AM  
 Report File: "AnalysisReport\_20230505\_071110Z.pdf"  
 Username: Default UserEx  
 Version(s): GUI: 2.5.98.4131  
 DataSet Name: "20221122\_Uni\_Graz"  
 Proc. Data Folder: "pdata\_Evaluation report\_20221124\_114232Z"  
 Processed Date: Thursday, November 24, 2022 12:42:32 PM

### Table of Analyzed Sample Data:

| Clr                                                                               | Included? | Collection Type    | Replicate | Sample Name   |
|-----------------------------------------------------------------------------------|-----------|--------------------|-----------|---------------|
|  | Yes       | Sample/Buffer (SB) | (avg)     | RS_1.Buffer 1 |
|  | Yes       | Sample/Buffer (SB) | (avg)     | RS_2.Buffer 2 |
|  | Yes       | Sample/Buffer (SB) | (avg)     | RS_3.Buffer 3 |
|  | Yes       | Model Protein      |           | NIST mAb      |

### Table of Sample Replicates in Averaging:

| Clr                                                                                 | Included? | Collection Type    | Replicate | Sample Name   |
|-------------------------------------------------------------------------------------|-----------|--------------------|-----------|---------------|
|    | Yes       | Sample/Buffer (SB) | 01        | RS_1.Buffer 1 |
|    | Yes       | Sample/Buffer (SB) | 02        | RS_1.Buffer 1 |
|    | Yes       | Sample/Buffer (SB) | 03        | RS_1.Buffer 1 |
|   | Yes       | Sample/Buffer (SB) | 01        | RS_2.Buffer 2 |
|  | Yes       | Sample/Buffer (SB) | 02        | RS_2.Buffer 2 |
|  | Yes       | Sample/Buffer (SB) | 03        | RS_2.Buffer 2 |
|  | Yes       | Sample/Buffer (SB) | 01        | RS_3.Buffer 3 |
|  | Yes       | Sample/Buffer (SB) | 02        | RS_3.Buffer 3 |
|  | Yes       | Sample/Buffer (SB) | 03        | RS_3.Buffer 3 |

## Table of Water and Buffer Replicates:

| Included? | Collection Type    | Replicate | Sample Name    |
|-----------|--------------------|-----------|----------------|
| Yes       | Water/Water (WW)   | 01        | Water          |
| Yes       | Water/Water (WW)   | 02        | Water          |
| Yes       | Water/Water (WW)   | 03        | Water          |
| Yes       | Buffer/Water (BW)  | 01        | Buffer 1.Water |
| Yes       | Buffer/Water (BW)  | 02        | Buffer 1.Water |
| Yes       | Buffer/Water (BW)  | 03        | Buffer 1.Water |
| Yes       | Buffer/Buffer (BB) | 01        | Buffer 1       |
| Yes       | Buffer/Buffer (BB) | 02        | Buffer 1       |
| Yes       | Buffer/Buffer (BB) | 03        | Buffer 1       |
| Yes       | Buffer/Water (BW)  | 01        | Buffer 2.Water |
| Yes       | Buffer/Water (BW)  | 02        | Buffer 2.Water |
| Yes       | Buffer/Water (BW)  | 03        | Buffer 2.Water |
| Yes       | Buffer/Buffer (BB) | 01        | Buffer 2       |
| Yes       | Buffer/Buffer (BB) | 02        | Buffer 2       |
| Yes       | Buffer/Buffer (BB) | 03        | Buffer 2       |
| Yes       | Buffer/Water (BW)  | 01        | Buffer 3.Water |
| Yes       | Buffer/Water (BW)  | 02        | Buffer 3.Water |
| Yes       | Buffer/Water (BW)  | 03        | Buffer 3.Water |
| Yes       | Buffer/Buffer (BB) | 01        | Buffer 3       |
| Yes       | Buffer/Buffer (BB) | 02        | Buffer 3       |
| Yes       | Buffer/Buffer (BB) | 03        | Buffer 3       |

## Graph Results: Raw Diff AU

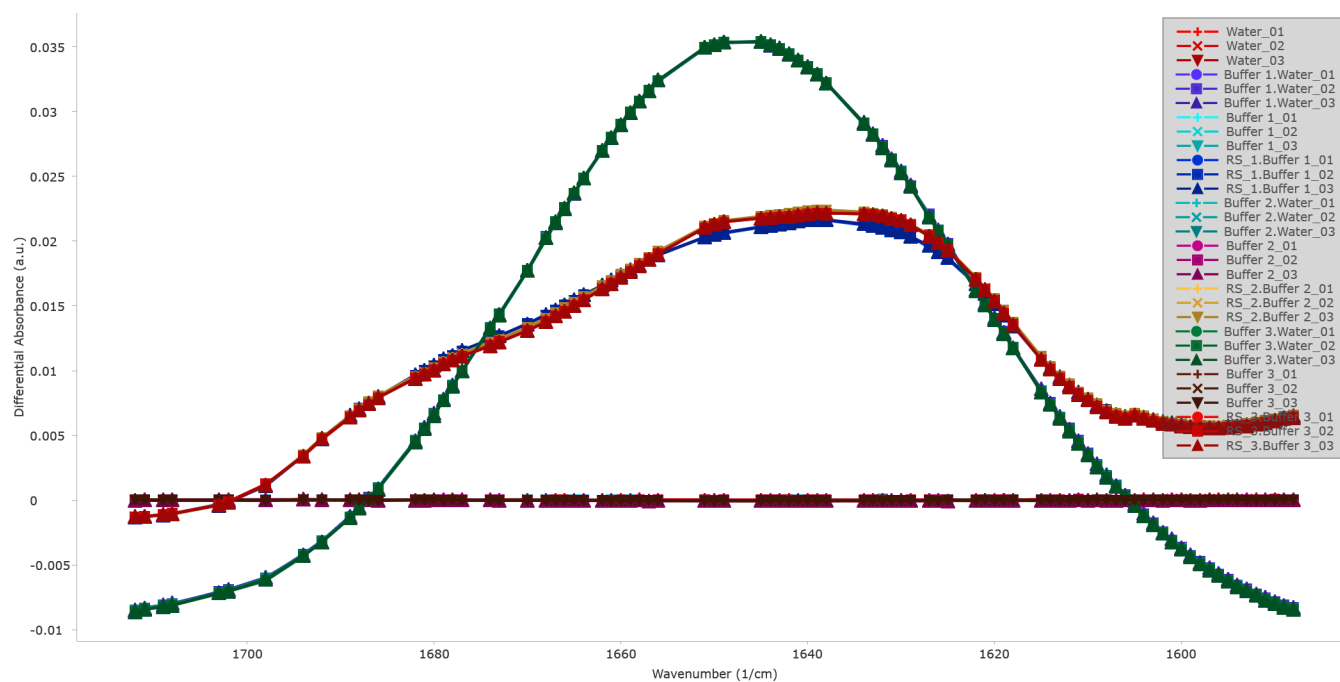

## Graph Results: Absolute AU

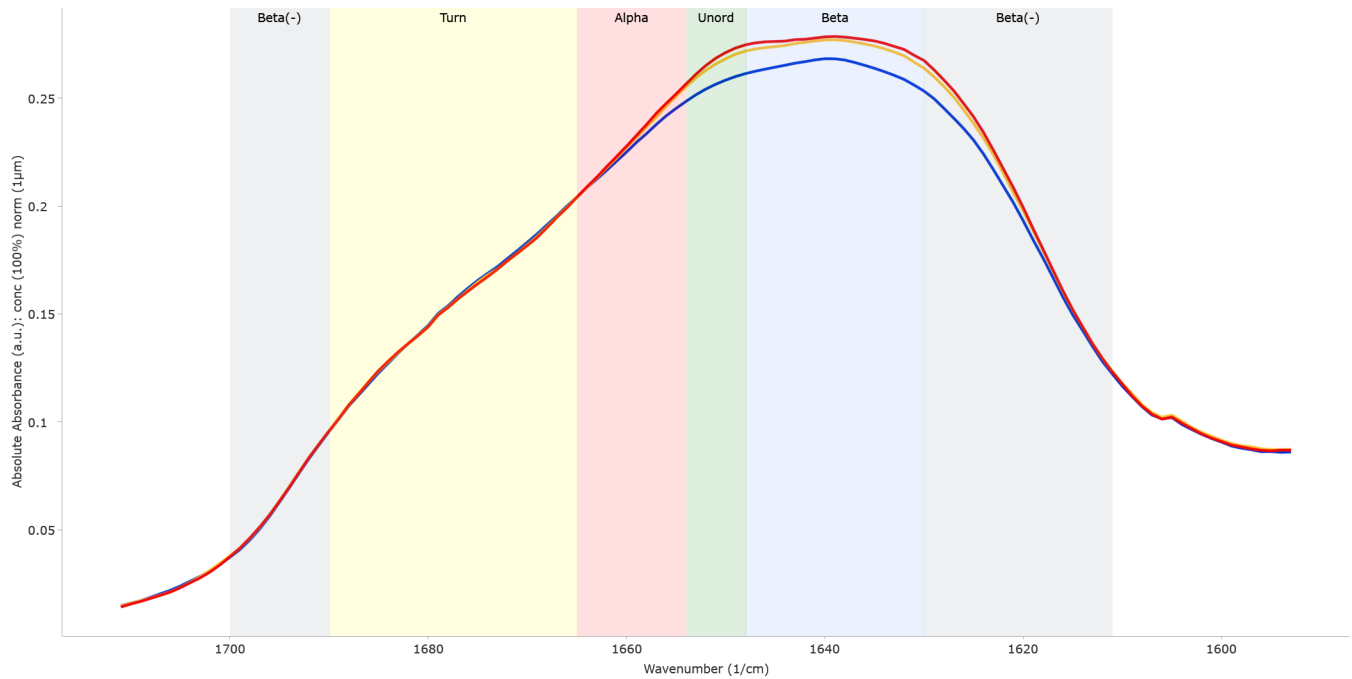

### Analysis Settings for Absolute Spectrum:

Cell Pathlength(μm): 23.50  
Water Data: "water spectra"  
Normalization  
100% Conc: True  
1 μm Path: True  
Spacing(1/cm): 1.0  
Interpolation: Spline

## Graph Results: Second Derivative

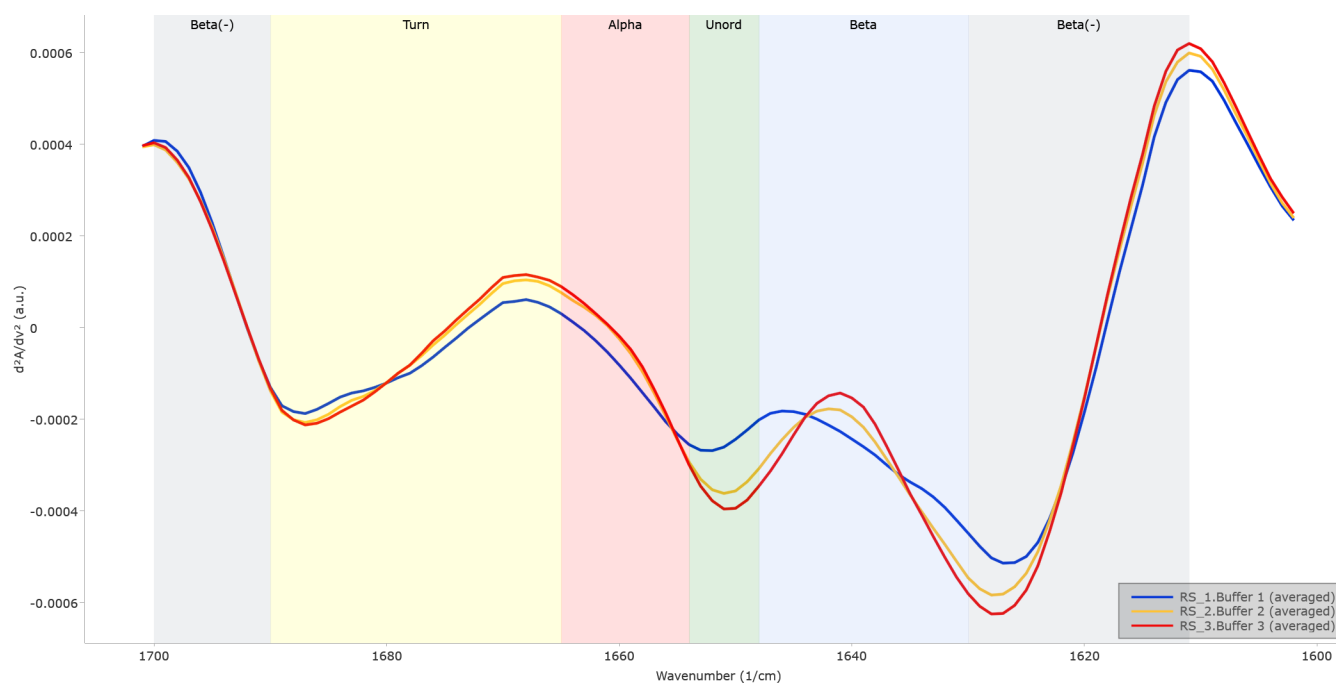

### Analysis Settings for Second Derivative:

Normalization: False  
Smoothing Window Size  
Sample/Model: 19

## Graph Results: Similarity (Area of Overlap)

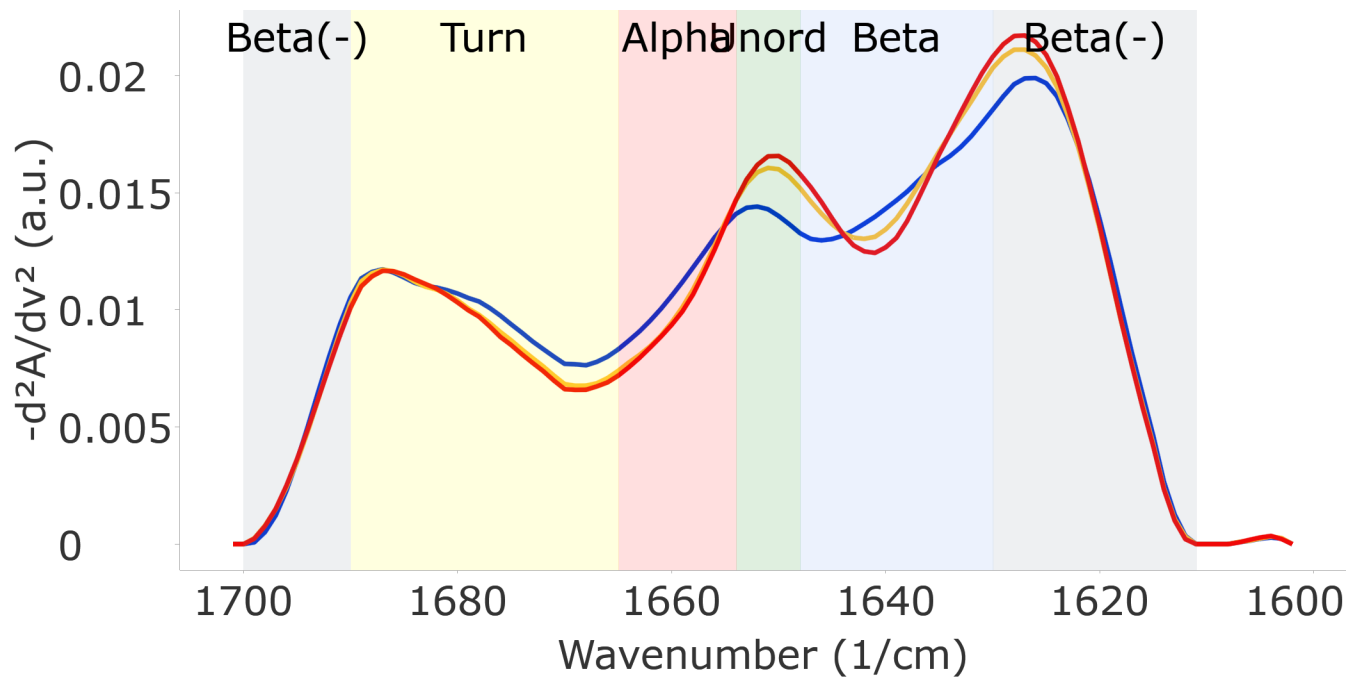

## Analysis Settings for Similarity (Area of Overlap):

|                        |                   |
|------------------------|-------------------|
| Spectral Range:        | Full Data Range   |
| Baseline:              | Rubberband        |
| Normalization:         | Normalize to Area |
| Comparison:            | Mean/Selected     |
| Include Model Protein: | False             |

### Graph of Area of Overlap and Comparison Set:

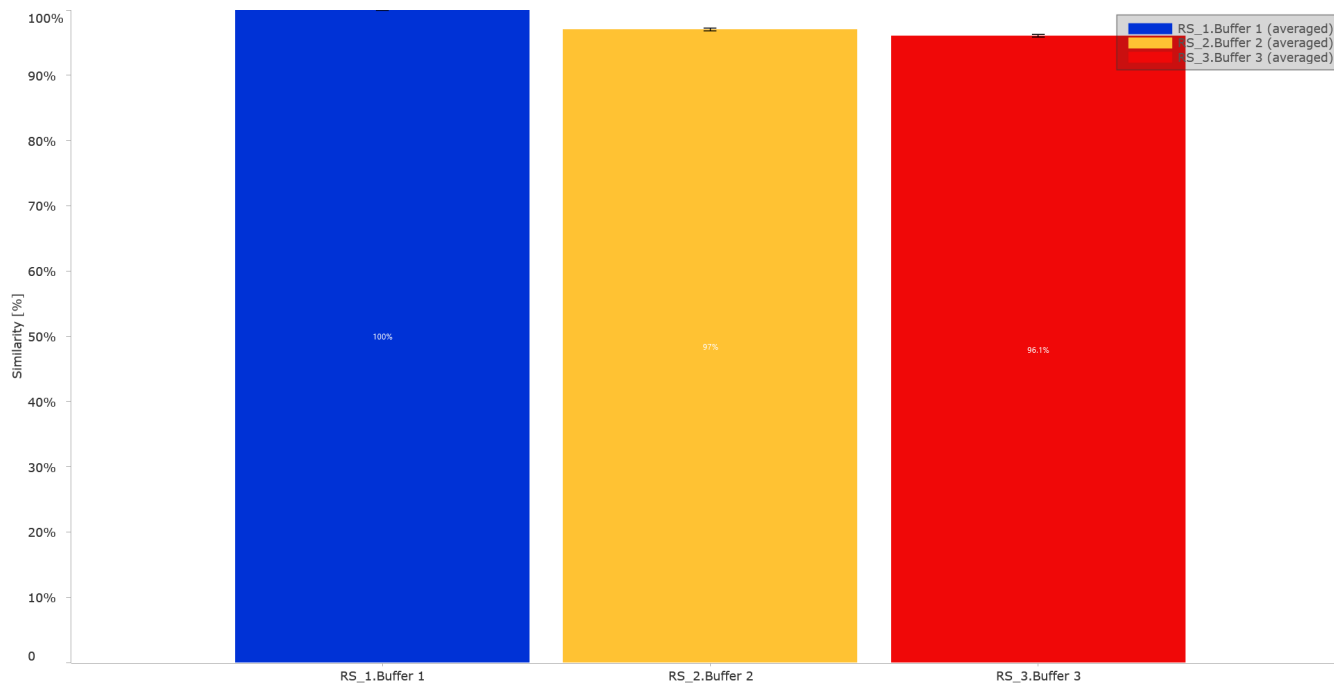

### Table of Area of Overlap and Comparison Set:

| AO(%) | CompareSet | Replicate | Sample Name   |
|-------|------------|-----------|---------------|
| 100.0 | Yes        | (avg)     | RS_1.Buffer 1 |
| 97.0  | No         | (avg)     | RS_2.Buffer 2 |
| 96.1  | No         | (avg)     | RS_3.Buffer 3 |
| 72.5  | No         |           | NIST mAb      |

### Similarity (Area of Overlap) Replicate Summary Table:

| Conc (mg/mL) | Mean±SD    | Repeat. | AO (%) of Replicates | Sample Name   |
|--------------|------------|---------|----------------------|---------------|
| 5.00         | 99.72±0.04 | 99.72   | 99.8, 99.7, 99.7     | RS_1.Buffer 1 |
| 5.00         | 96.92±0.21 | 99.54   | 96.7, 97.0, 97.1     | RS_2.Buffer 2 |
| 5.00         | 96.02±0.20 | 99.56   | 95.9, 95.9, 96.2     | RS_3.Buffer 3 |

## Graph Results: Similarity (Weighted Spectral Difference)

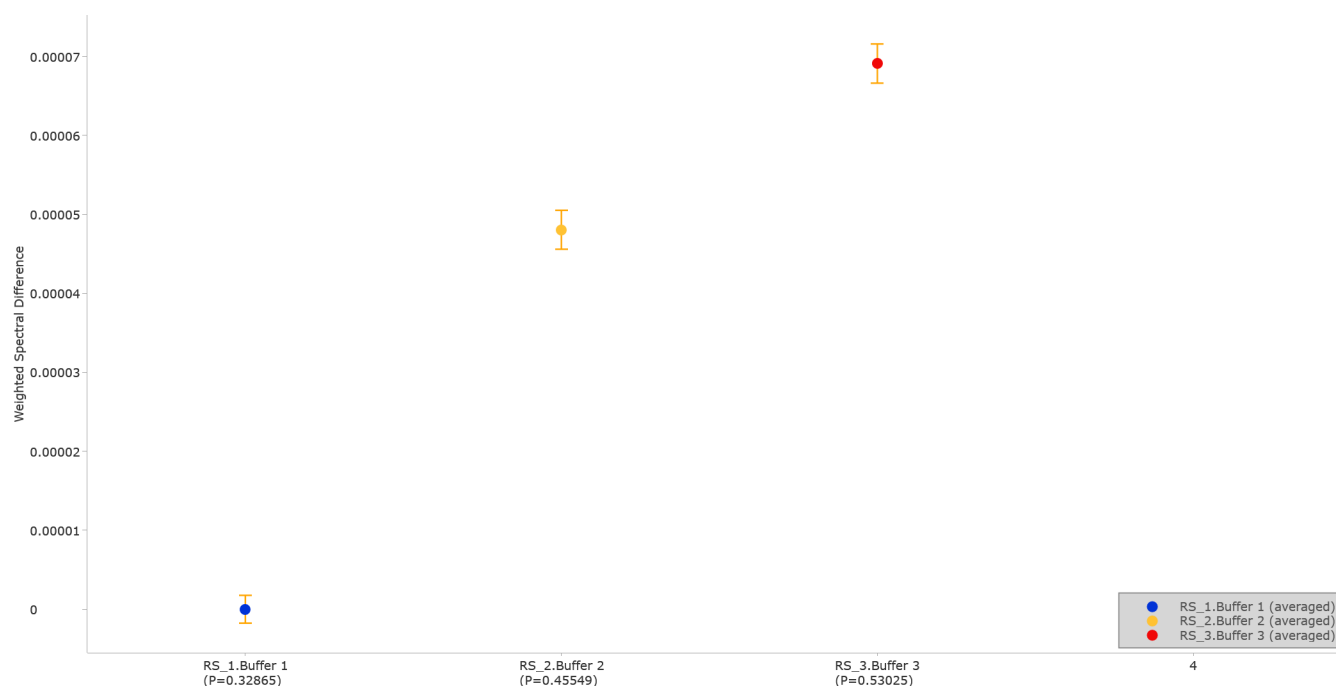

### Analysis Settings for Similarity (Weighted Spectral Difference):

Data Used: 2nd Derivative  
 Comparison: Mean/Selected

### Table of Weighted Spectral Difference and Comparison Set:

| WSD        | CompareSet | Replicate | Sample Name   |
|------------|------------|-----------|---------------|
| 0          | Yes        | (avg)     | RS_1.Buffer 1 |
| 4.805e-05  | No         | (avg)     | RS_2.Buffer 2 |
| 6.9098e-05 | No         | (avg)     | RS_3.Buffer 3 |
| 0.00052173 | No         |           | NIST mAb      |

### Area of Overlap and Weighted Spectral Difference Summary Table

| Sample              | AO Compare Set? | AO(%) | WSD Compare Set? | WSD        | P Value |
|---------------------|-----------------|-------|------------------|------------|---------|
| RS_1.Buffer 1_(avg) | Yes             | 100.0 | Yes              | 0          | 0.32865 |
| RS_3.Buffer 3_(avg) | No              | 96.1  | No               | 6.9098e-05 | 0.53025 |
| RS_2.Buffer 2_(avg) | No              | 97.0  | No               | 4.805e-05  | 0.45549 |
| NIST mAb            | No              | 72.5  | No               | 0.00052173 | N/A     |



## Graph Results: Delta

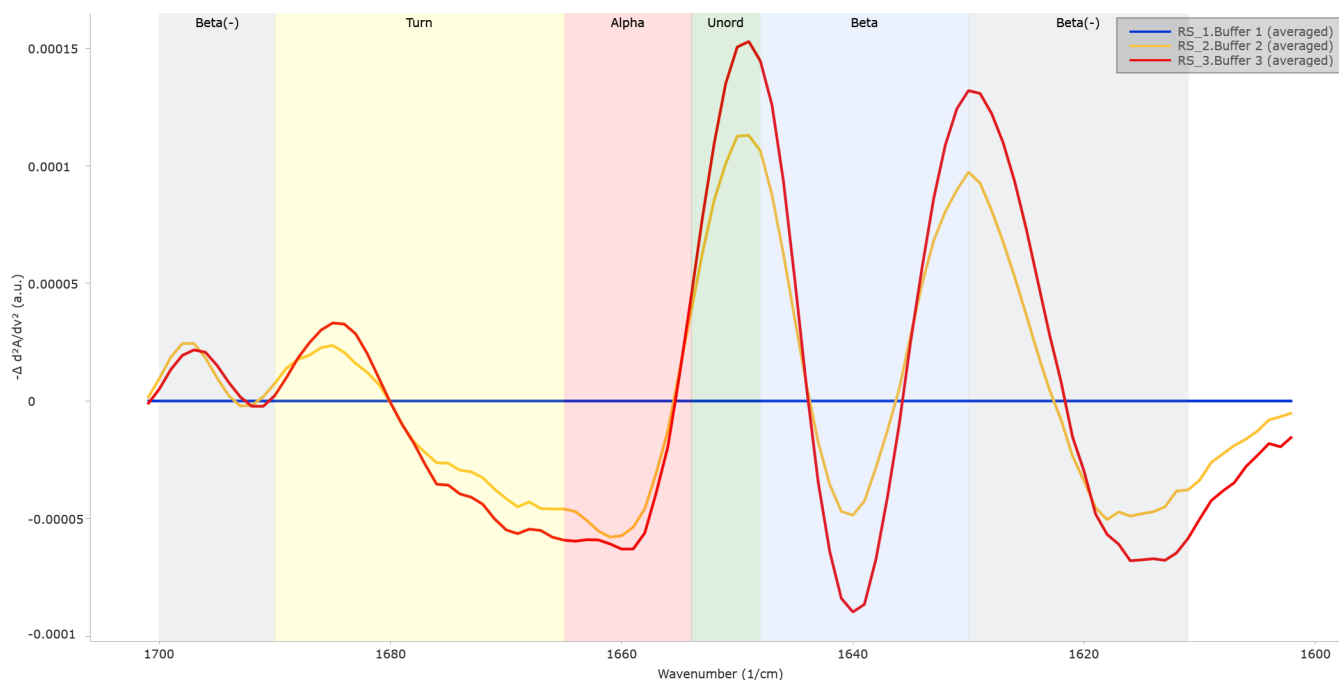

### Analysis Settings for Delta:

Use 2ndDeriv: True  
 Comparison: Mean/Selected  
 Include Model Protein: False  
 Min/Max Delta Range: 0.0000000E+000 to 0.0000000E+000

### Table of Delta Bounds and Comparison Set:

| Within Min/Max Bounds | CompareSet | Replicate | Sample Name   |
|-----------------------|------------|-----------|---------------|
| N/A                   | Yes        | (avg)     | RS_1.Buffer 1 |
| N/A                   | No         | (avg)     | RS_2.Buffer 2 |
| N/A                   | No         | (avg)     | RS_3.Buffer 3 |
| N/A                   | No         |           | NIST mAb      |

# Graph Results: Stability

Data used for Stability: Delta

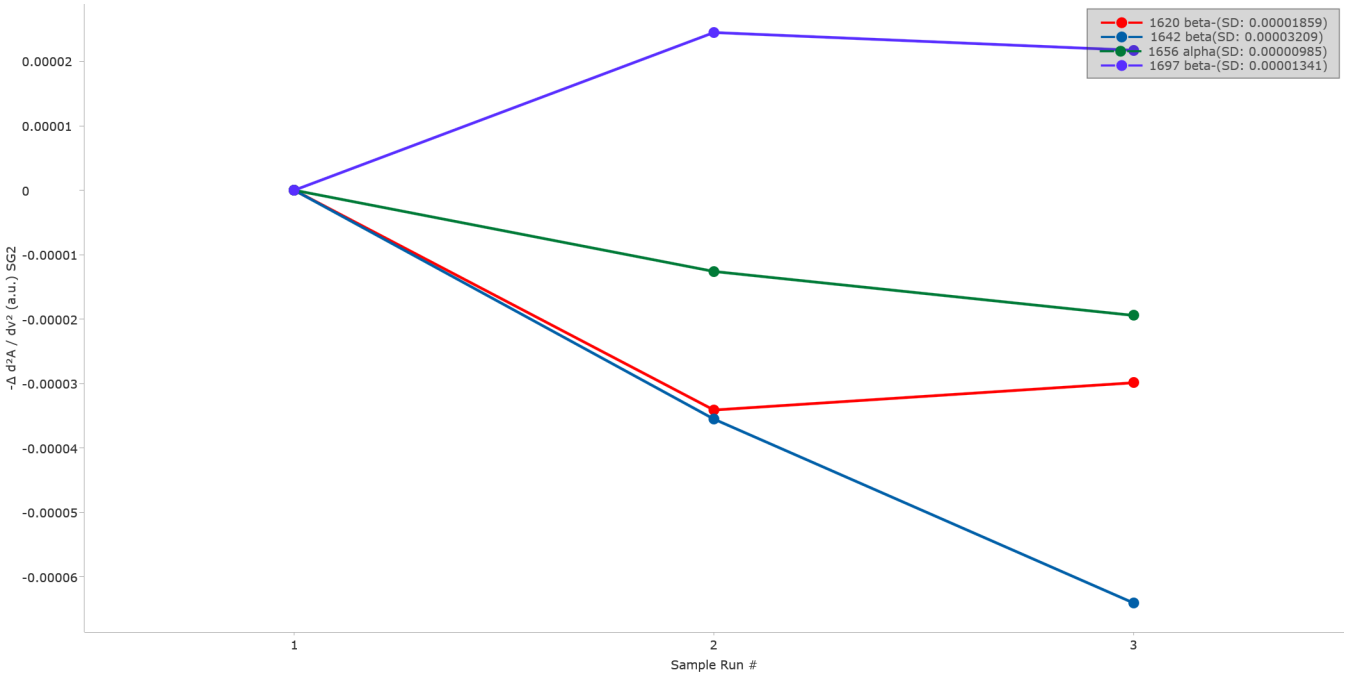

## Graph Results: Quantitation

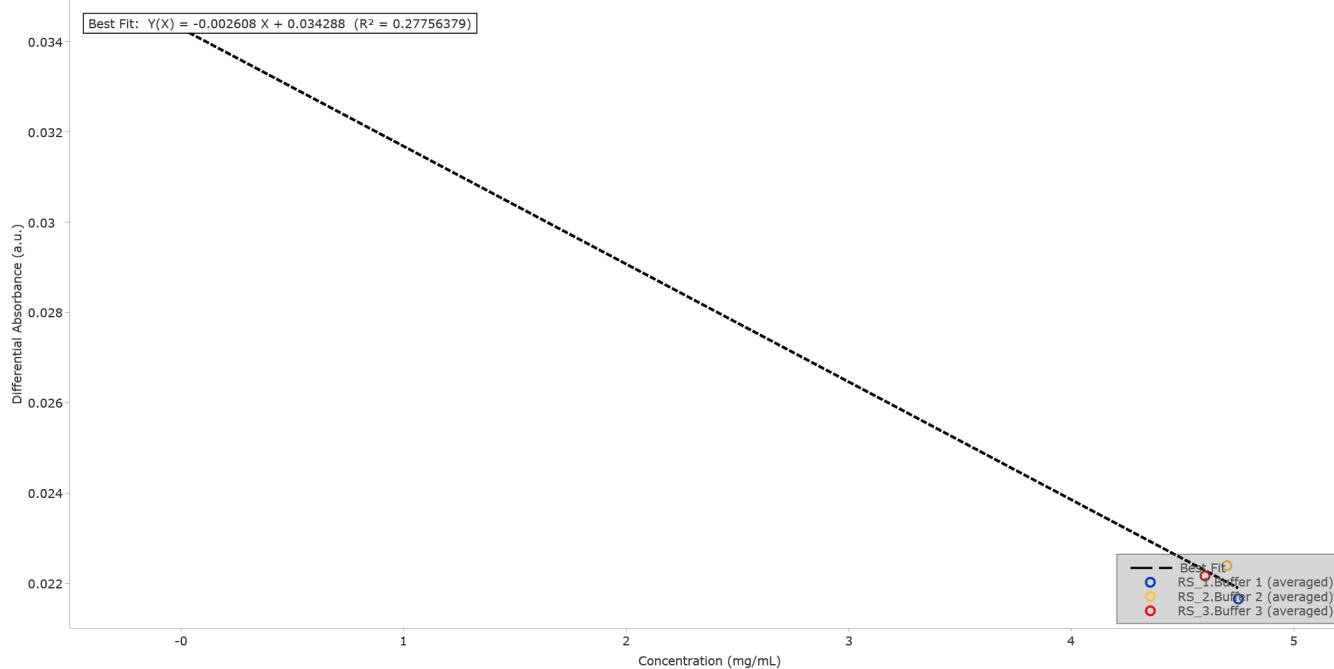

### Analysis Settings for Quantitation:

Model Protein: NIST mAb  
 Concentration Plotted: Fit

### Table of Concentrations and Displacement Factors:

| Conc (mg/mL) | Fit Conc(mg/mL) | Fit DF | Replicate | Sample Name   |
|--------------|-----------------|--------|-----------|---------------|
| 5.00         | 4.75            | 0.6000 | (avg)     | RS_1.Buffer 1 |
| 5.00         | 4.70            | 0.6000 | (avg)     | RS_2.Buffer 2 |
| 5.00         | 4.60            | 0.5940 | (avg)     | RS_3.Buffer 3 |

## Graph Results: Gaussian Fit

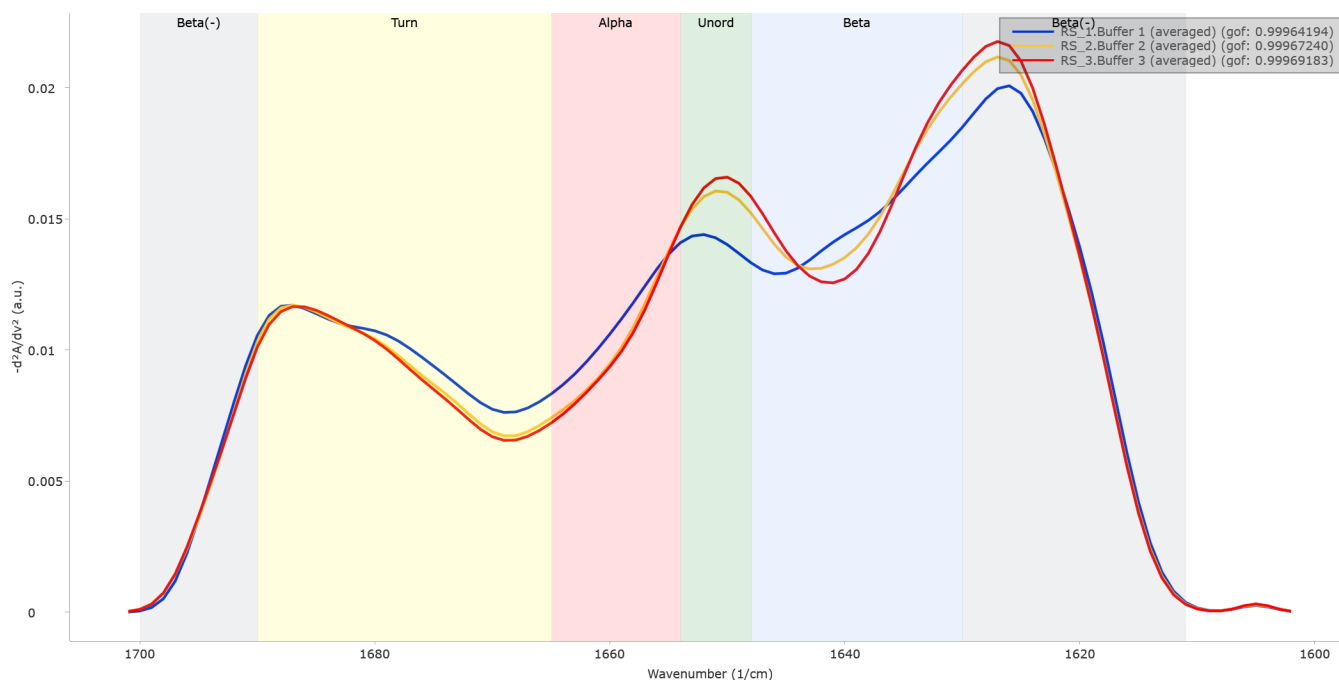

## Table of Gaussian Fit R²:

| Gaussian Fit R² Value | Replicate | Sample Name   |
|-----------------------|-----------|---------------|
| 0.99964               | (avg)     | RS_1.Buffer 1 |
| 0.99967               | (avg)     | RS_2.Buffer 2 |
| 0.99969               | (avg)     | RS_3.Buffer 3 |

## Table of Gaussian Term Settings (\*default):

| Wavelength(1/cm) | Structure | PeakWindow(+/-) | FWHM(1/cm) |
|------------------|-----------|-----------------|------------|
| 1597.0           | side      | 1.0 *           | 10 *       |
| 1610.0           | beta-     | -5.0 to 0.0 *   | 6 *        |
| 1618.0           | beta-     | 3.0 *           | 6 *        |
| 1626.0           | beta-     | 1.0 *           | 6 *        |
| 1632.0           | beta      | 1.0 *           | 6 *        |
| 1642.0           | beta      | 1.0 *           | 6 *        |
| 1650.0           | unord     | 1.0 *           | 6 *        |
| 1656.0           | alpha     | 1.0 *           | 6 *        |
| 1660.0           | turn      | 1.0 *           | 6 *        |
| 1666.0           | turn      | 1.0 *           | 6 *        |
| 1672.0           | turn      | 1.0 *           | 6 *        |
| 1680.0           | turn      | 1.0 *           | 6 *        |
| 1688.0           | turn      | 1.0 *           | 6 *        |
| 1690.0           | beta      | 1.0 *           | 6 *        |
| 1695.0           | beta-     | 1.0 *           | 6 *        |
| 1704.0           | side      | 1.0 *           | 20 *       |

## Graph Results: HOS (Structure)

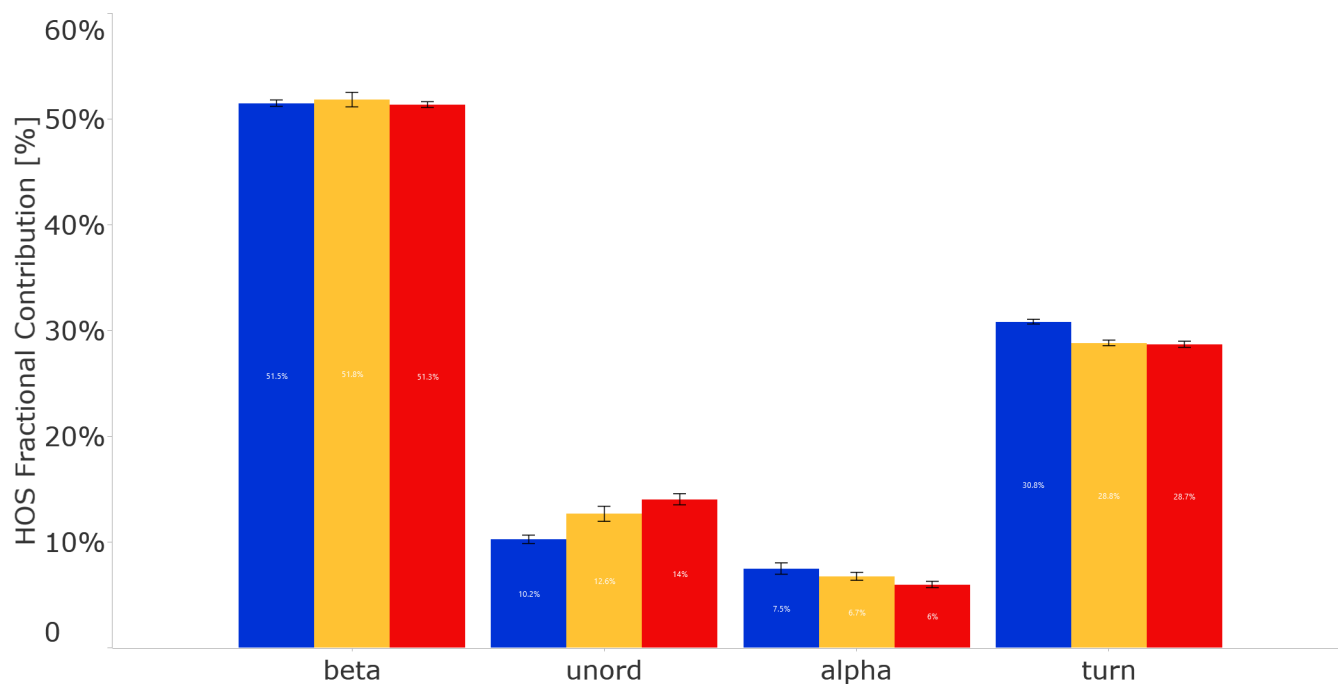

### Table of HOS Statistics:

| HOS Bin Name | Fractional(%) Mean | Fractional(%) StdDev |
|--------------|--------------------|----------------------|
| beta         | 51.5               | 0.24                 |
| unord        | 12.3               | 1.92                 |
| alpha        | 6.7                | 0.75                 |
| turn         | 29.4               | 1.20                 |

### High Order Structure (HOS) Replicate Summary Table:

| Conc (mg/mL) | beta<br>Mean±SD | unord<br>Mean±SD | alpha<br>Mean±SD | turn<br>Mean±SD | Sample Name   |
|--------------|-----------------|------------------|------------------|-----------------|---------------|
| 5.00         | 51.7±0.30       | 10.2±0.40        | 7.4±0.54         | 30.7±0.22       | RS_1.Buffer 1 |
| 5.00         | 52.0±0.69       | 12.4±0.71        | 6.7±0.38         | 28.9±0.26       | RS_2.Buffer 2 |
| 5.00         | 51.6±0.27       | 13.9±0.53        | 5.9±0.30         | 28.6±0.29       | RS_3.Buffer 3 |
