# Supplementary material for: Vibrio cholerae’s ToxRS bile sensing system
Source: eLife. 2023 Sep 28;12:e88721. doi: 10.7554/eLife.88721 (PMC10624426; doi:10.7554/eLife.88721)
Supplement: Figure 4—source data 1. [file elife-88721-fig4-data1.zip › MMS_source_data/pdata_rawSummary.csv]

Wavenumber(1/cm)	Water_1	Wavenumber(1/cm)	Water_2	Wavenumber(1/cm)	Water_3	Wavenumber(1/cm)	Buffer 1.Water_1	Wavenumber(1/cm)	Buffer 1.Water_2	Wavenumber(1/cm)	Buffer 1.Water_3	Wavenumber(1/cm)	Buffer 1_1	Wavenumber(1/cm)	Buffer 1_2	Wavenumber(1/cm)	Buffer 1_3	Wavenumber(1/cm)	RS_1.Buffer 1_1	Wavenumber(1/cm)	RS_1.Buffer 1_2	Wavenumber(1/cm)	RS_1.Buffer 1_3	Wavenumber(1/cm)	Buffer 2.Water_1	Wavenumber(1/cm)	Buffer 2.Water_2	Wavenumber(1/cm)	Buffer 2.Water_3	Wavenumber(1/cm)	Buffer 2_1	Wavenumber(1/cm)	Buffer 2_2	Wavenumber(1/cm)	Buffer 2_3	Wavenumber(1/cm)	RS_2.Buffer 2_1	Wavenumber(1/cm)	RS_2.Buffer 2_2	Wavenumber(1/cm)	RS_2.Buffer 2_3	Wavenumber(1/cm)	Buffer 3.Water_1	Wavenumber(1/cm)	Buffer 3.Water_2	Wavenumber(1/cm)	Buffer 3.Water_3	Wavenumber(1/cm)	Buffer 3_1
1712	-7.594396E-06	1712	4.325043E-06	1712	-4.066339E-06	1712	-0.00842970443	1712	-0.00846811068	1712	-0.008477050797	1712	4.8327495E-05	1712	5.543736E-06	1712	-3.3681832E-05	1712	-0.001300178225	1712	-0.001317013754	1712	-0.001304970951	1712	-0.008513872022	1712	-0.008503652999	1712	-0.00848564204	1712	1.1725531E-05	1712	-1.947709E-06	1712	3.1283E-08	1712	-0.001304303635	1712	-0.001257498144	1712	-0.001314418903	1712	-0.008589767502	1712	-0.008620003211	1712	-0.008628458372	1712	1.3234856E-05
1711	4.4510282E-05	1711	2.2071575E-05	1711	2.5557415E-05	1711	-0.008318717677	1711	-0.008328706274	1711	-0.008319195499	1711	-1.9208412E-05	1711	1.6195147E-05	1711	-6.430544E-06	1711	-0.001235263422	1711	-0.001301537545	1711	-0.001271552	1711	-0.008382101803	1711	-0.008394953137	1711	-0.008360177109	1711	-3.2300695E-05	1711	3.9991115E-05	1711	1.5535107E-05	1711	-0.00129258813	1711	-0.001260802895	1711	-0.001246805221	1711	-0.008439115516	1711	-0.008444808927	1711	-0.008439973138	1711	3.2831335E-05
1709	3.200659E-05	1709	1.7511065E-05	1709	1.2205267E-05	1709	-0.008089105548	1709	-0.008099330251	1709	-0.008105952289	1709	5.623736E-06	1709	5.93549E-07	1709	8.73698E-06	1709	-0.001167472531	1709	-0.001142254818	1709	-0.001147146672	1709	-0.008107021135	1709	-0.008128036645	1709	-0.008160731101	1709	-2.1364318E-05	1709	3.814837E-06	1709	3.9405774E-05	1709	-0.001145384842	1709	-0.001147973316	1709	-0.001125067109	1709	-0.008160612672	1709	-0.008217902587	1709	-0.008231233843	1709	2.8372266E-05
1708	8.792171E-06	1708	2.6288308E-05	1708	2.5505753E-05	1708	-0.00797737669	1708	-0.008004735561	1708	-0.007957412791	1708	2.3583513E-05	1708	-1.2079258E-05	1708	-3.0327911E-05	1708	-0.001037912299	1708	-0.001074695533	1708	-0.001053014008	1708	-0.008034822764	1708	-0.008057708348	1708	-0.008006457186	1708	-3.529916E-05	1708	3.132314E-06	1708	4.2565625E-05	1708	-0.001066367249	1708	-0.001082204889	1708	-0.001070869546	1708	-0.008090943868	1708	-0.008115532283	1708	-0.008128453664	1708	-7.30259E-07
1703	-3.1631641E-05	1703	3.6948618E-05	1703	3.0572653E-05	1703	-0.00709017546	1703	-0.007057691326	1703	-0.00712654941	1703	2.3182239E-05	1703	-6.51802E-06	1703	3.4943763E-05	1703	-0.000301328685	1703	-0.000343248988	1703	-0.000400685366	1703	-0.00717503299	1703	-0.007141488801	1703	-0.007132099075	1703	-2.8417366E-05	1703	1.9918316E-05	1703	2.6289274E-05	1703	-0.00034714232	1703	-0.000354612256	1703	-0.000380058601	1703	-0.007199093099	1703	-0.007225893349	1703	-0.00714736848	1703	2.0846446E-05
1702	1.4840235E-05	1702	-2.68395E-05	1702	5.0287204E-05	1702	-0.006909375531	1702	-0.006895157019	1702	-0.006892296852	1702	5.4998613E-05	1702	2.0799E-07	1702	1.341823E-05	1702	-0.000109227611	1702	-0.000168842526	1702	-0.00013165982	1702	-0.007024276211	1702	-0.007007810613	1702	-0.006948000476	1702	9.372306E-06	1702	1.9120649E-05	1702	4.1053684E-05	1702	-0.000102431032	1702	-8.3903065E-05	1702	-0.00012802487	1702	-0.00696049908	1702	-0.007045242691	1702	-0.00703469574	1702	6.8317953E-05
1698	-1.32385E-06	1698	1.0532256E-05	1698	1.3817331E-05	1698	-0.006051292503	1698	-0.006030252088	1698	-0.005959952301	1698	4.9281708E-05	1698	-1.2520204E-05	1698	7.203347E-06	1698	0.001085182516	1698	0.001131856345	1698	0.001125332136	1698	-0.006087262858	1698	-0.00609631805	1698	-0.006026948744	1698	7.501032E-06	1698	-2.1948547E-05	1698	5.3935627E-05	1698	0.001209508541	1698	0.001172918301	1698	0.001178242109	1698	-0.006161273348	1698	-0.006220729473	1698	-0.0061212287	1698	1.5498226E-05
1694	1.319753E-05	1694	4.9825463E-05	1694	1.6471493E-05	1694	-0.004160869556	1694	-0.004197156408	1694	-0.004237177381	1694	-6.484676E-06	1694	1.2155929E-05	1694	9.140321E-06	1694	0.003430739194	1694	0.003458446139	1694	0.003413632785	1694	-0.004238963267	1694	-0.004233667773	1694	-0.004252691999	1694	-3.5723905E-05	1694	1.6019504E-05	1694	5.6784397E-05	1694	0.003427334155	1694	0.003471325989	1694	0.003517653532	1694	-0.004248884049	1694	-0.004335645671	1694	-0.004288093192	1694	2.2059592E-05
1692	3.8167704E-05	1692	3.360128E-06	1692	4.5313762E-05	1692	-0.003140051172	1692	-0.003125169558	1692	-0.003213863908	1692	-3.5841819E-05	1692	-1.42345E-05	1692	-1.2342587E-05	1692	0.004782472629	1692	0.004791021222	1692	0.004739711309	1692	-0.003220118821	1692	-0.003235233724	1692	-0.003170684036	1692	1.3859233E-05	1692	6.820488E-06	1692	4.3823415E-05	1692	0.00474081707	1692	0.0047763766	1692	0.004840126596	1692	-0.003192480793	1692	-0.003225540928	1692	-0.003244056642	1692	4.438222E-06
1689	1.977343E-05	1689	9.552151E-06	1689	9.85949E-06	1689	-0.001216138524	1689	-0.001320327101	1689	-0.001278654947	1689	-2.0301831E-05	1689	-2.1980179E-05	1689	-2.9222559E-05	1689	0.006456565761	1689	0.006505632044	1689	0.006549493063	1689	-0.001303416305	1689	-0.001371971619	1689	-0.001296793607	1689	3.281311E-06	1689	-1.5193073E-05	1689	1.2531409E-05	1689	0.006447099187	1689	0.006445804623	1689	0.006521724901	1689	-0.001333238278	1689	-0.001355849596	1689	-0.001364944791	1689	1.8269698E-05
1688	6.6391455E-05	1688	1.0901865E-05	1688	-1.4403643E-05	1688	-0.000499665493	1688	-0.000534199872	1688	-0.000537853365	1688	6.797709E-06	1688	3.0158407E-05	1688	-2.6879409E-05	1688	0.007032413179	1688	0.00712359031	1688	0.007072905855	1688	-0.000561782041	1688	-0.00055321956	1688	-0.000529573383	1688	9.171793E-06	1688	1.1124892E-05	1688	7.003082E-06	1688	0.007060313797	1688	0.007058803093	1688	0.007069522482	1688	-0.000570203403	1688	-0.000575152673	1688	-0.000609855254	1688	4.3915805E-05
1687	3.563618E-05	1687	2.6983458E-05	1687	6.670674E-06	1687	0.00023775478	1687	0.000209004787	1687	0.000119132405	1687	1.2967174E-05	1687	2.20347E-07	1687	-1.2780465E-05	1687	0.007503726153	1687	0.007550875551	1687	0.00751968773	1687	0.000158396754	1687	9.4282447E-05	1687	0.000144233578	1687	-1.5561718E-05	1687	-2.2757353E-05	1687	9.609825E-06	1687	0.00752956145	1687	0.007534740252	1687	0.00758857705	1687	0.000184131813	1687	6.9844152E-05	1687	0.00011314419	1687	1.8273133E-05
1686	2.0432916E-05	1686	1.1875621E-05	1686	1.6114999E-05	1686	0.000949043392	1686	0.000953554791	1686	0.000879902328	1686	1.9967056E-05	1686	-1.5147046E-05	1686	3.1752941E-05	1686	0.007959472498	1686	0.00802275132	1686	0.007986654891	1686	0.000932819022	1686	0.000854163709	1686	0.000949533202	1686	3.5301165E-05	1686	-4.2277014E-05	1686	-6.624882E-06	1686	0.008026199113	1686	0.007999075749	1686	0.008040552684	1686	0.000868726971	1686	0.000896134444	1686	0.000844815197	1686	4.592494E-06
1682	4.5533069E-05	1682	-5.702992E-06	1682	3.0728658E-05	1682	0.004622366753	1682	0.004586625139	1682	0.004576414102	1682	1.2086111E-05	1682	2.742199E-05	1682	1.5000686E-05	1682	0.009668493676	1682	0.009636129035	1682	0.009679149123	1682	0.004502463208	1682	0.004537935657	1682	0.004616080275	1682	1.0410783E-05	1682	2.6274749E-05	1682	1.74047E-07	1682	0.009581330542	1682	0.009543638264	1682	0.009547070958	1682	0.004461207999	1682	0.004531726843	1682	0.004472650245	1682	1.9851144E-05
1681	6.6106939E-05	1681	4.417936E-06	1681	1.9291505E-05	1681	0.005621692523	1681	0.005557223877	1681	0.005604888998	1681	3.7201318E-05	1681	1.354768E-05	1681	4.3005303E-05	1681	0.00999341623	1681	0.010015201605	1681	0.010025790169	1681	0.005526666206	1681	0.005561430747	1681	0.005590717754	1681	-2.1248926E-05	1681	2.5518436E-05	1681	-1.4289313E-05	1681	0.009880245182	1681	0.009878564646	1681	0.009848314494	1681	0.005521531146	1681	0.005542454334	1681	0.005513656183	1681	-3.18361E-06
1680	4.8281446E-05	1680	-1.4613158E-05	1680	1.5066177E-05	1680	0.006641618237	1680	0.006690148314	1680	0.006690478582	1680	-5.274882E-06	1680	1.7952238E-05	1680	2.4853125E-05	1680	0.010372420904	1680	0.010378326772	1680	0.010400933848	1680	0.006594477029	1680	0.006514886348	1680	0.006650311068	1680	5.803863E-06	1680	2.5537588E-05	1680	1.2668142E-05	1680	0.010206577902	1680	0.010198938932	1680	0.010204638399	1680	0.006638111346	1680	0.006560104337	1680	0.006493688359	1680	-7.188247E-06
1679	2.1600039E-05	1679	6.547843E-06	1679	-2.8450669E-05	1679	0.007812245152	1679	0.007768895614	1679	0.007784877688	1679	1.0376655E-05	1679	8.260445E-06	1679	1.7074469E-05	1679	0.010869503374	1679	0.010873050851	1679	0.010908820567	1679	0.007712974746	1679	0.00772051242	1679	0.007756272877	1679	-2.1311514E-05	1679	3.8706118E-05	1679	1.5922457E-05	1679	0.010726630354	1679	0.010690021484	1679	0.010687401895	1679	0.007695140903	1679	0.007734503408	1679	0.007736725397	1679	-3.9938776E-05
1678	4.0494732E-05	1678	1.0509106E-05	1678	-1.2732429E-05	1678	0.008866208594	1678	0.008835699055	1678	0.008895213203	1678	1.7488689E-05	1678	1.4231046E-05	1678	3.2343388E-05	1678	0.011188586847	1678	0.011170107446	1678	0.01117331881	1678	0.008819096745	1678	0.008792307333	1678	0.008877729124	1678	-2.541352E-06	1678	7.956574E-06	1678	1.1795992E-05	1678	0.01101226185	1678	0.01100274788	1678	0.010951350091	1678	0.008824180513	1678	0.008801437868	1678	0.008811856788	1678	-3.5157198E-05
1677	4.7024814E-05	1677	-8.97958E-07	1677	1.38188E-07	1677	0.0099947567	1677	0.009962453417	1677	0.009996717191	1677	-1.644069E-06	1677	1.9630595E-05	1677	1.769509E-05	1677	0.011528862616	1677	0.01150312918	1677	0.011577338888	1677	0.009975579253	1677	0.009922224322	1677	0.009986040968	1677	-1.6856496E-05	1677	1.9942889E-05	1677	4.4114118E-05	1677	0.011316500632	1677	0.011324232565	1677	0.011244481903	1677	0.009945363583	1677	0.009960635649	1677	0.009952616399	1677	3.915181E-06
1674	6.534334E-06	1674	-1.3396595E-05	1674	-1.5974935E-05	1674	0.013288684285	1674	0.013244769421	1674	0.013288671484	1674	-5.543048E-06	1674	1.7719332E-05	1674	1.6463111E-05	1674	0.012406574199	1674	0.012426485201	1674	0.012425516591	1674	0.013254451039	1674	0.013275440975	1674	0.013326925762	1674	-2.9500836E-05	1674	1.3382511E-05	1674	9.224312E-06	1674	0.012169009833	1674	0.012215377221	1674	0.012186228	1674	0.013310247299	1674	0.013262829524	1674	0.013279546148	1674	1.8034692E-05
1673	3.8600161E-05	1673	-2.6284737E-05	1673	1.5371087E-05	1673	0.014414932211	1673	0.014339588744	1673	0.01432793952	1673	4.22015E-07	1673	-2.6323602E-05	1673	-1.0311551E-05	1673	0.01266785645	1673	0.012680211687	1673	0.012702840808	1673	0.014338620027	1673	0.01427480657	1673	0.014390397895	1673	-2.9420337E-05	1673	1.2065296E-05	1673	-1.0114887E-05	1673	0.012423753536	1673	0.012438505088	1673	0.012394805979	1673	0.014309085241	1673	0.014364096994	1673	0.014293038357	1673	-2.837555E-06
1670	6.0433559E-05	1670	-1.7413511E-05	1670	2.5052219E-05	1670	0.017729252137	1670	0.017744379494	1670	0.017721003945	1670	-6.77713E-06	1670	-1.6093463E-05	1670	3.8238417E-05	1670	0.013642687046	1670	0.013615729695	1670	0.013609083852	1670	0.017667624479	1670	0.017669954986	1670	0.017704774083	1670	-1.8867079E-05	1670	-4.596675E-06	1670	-6.543669E-06	1670	0.013336141821	1670	0.013318085641	1670	0.013341977661	1670	0.017679728662	1670	0.017726706993	1670	0.017752289206	1670	-1.9189439E-05
1668	2.0262881E-05	1668	-1.3909774E-05	1668	-1.2139826E-05	1668	0.020224711766	1668	0.020373719627	1668	0.020267765584	1668	-2.8438707E-05	1668	-1.757582E-06	1668	7.126104E-06	1668	0.014277917237	1668	0.014302749095	1668	0.014350593918	1668	0.020217854143	1668	0.020183392125	1668	0.020316195378	1668	-1.6387618E-05	1668	1.574539E-06	1668	-5.578817E-06	1668	0.014001795686	1668	0.014064721427	1668	0.014045061879	1668	0.020146494428	1668	0.020154546447	1668	0.020281613097	1668	-1.1681209E-05
1667	2.0893848E-05	1667	3.2103169E-05	1667	2.2977477E-05	1667	0.021283776999	1667	0.021439918854	1667	0.021395934749	1667	-3.7795355E-05	1667	5.45236E-06	1667	9.68086E-07	1667	0.014676593001	1667	0.014686367335	1667	0.014682014691	1667	0.021402729503	1667	0.021350696349	1667	0.021333693642	1667	3.150188E-06	1667	-1.0797604E-05	1667	-4.441795E-06	1667	0.014452693575	1667	0.01443714046	1667	0.01448002442	1667	0.021402102755	1667	0.021485602299	1667	0.021494145123	1667	-3.9219332E-05
1666	7.2441233E-05	1666	2.1182956E-05	1666	1.5339928E-05	1666	0.022479734229	1666	0.02249861232	1666	0.022521208209	1666	-2.4625709E-05	1666	-4.6926312E-05	1666	2.787258E-06	1666	0.015098734178	1666	0.015086762324	1666	0.015079982035	1666	0.022536914384	1666	0.022501707659	1666	0.022586637843	1666	-6.639407E-06	1666	-3.5250878E-05	1666	-3.0096905E-05	1666	0.014831667353	1666	0.014842136333	1666	0.014877864958	1666	0.022498852331	1666	0.022595940236	1666	0.022469654805	1666	-1.4513824E-05
1665	4.3456881E-05	1665	-6.94191E-07	1665	-3.295978E-06	1665	0.023717934764	1665	0.023697210414	1665	0.023684820046	1665	-2.9395163E-05	1665	-2.6227937E-05	1665	1.6611704E-05	1665	0.015439133543	1665	0.015414071614	1665	0.015458113516	1665	0.023663639483	1665	0.023649847067	1665	0.023662149241	1665	-5.7828423E-05	1665	-3.587943E-05	1665	-2.1201943E-05	1665	0.015235153395	1665	0.015310356262	1665	0.015252789063	1665	0.023728228182	1665	0.023675441911	1665	0.023737688229	1665	-2.903243E-05
1664	2.661956E-05	1664	-9.279898E-06	1664	3.412504E-06	1664	0.024819396012	1664	0.024862521783	1664	0.024865016846	1664	-1.0694956E-05	1664	-8.30545E-06	1664	1.3906751E-05	1664	0.015843082026	1664	0.01585475794	1664	0.01585101111	1664	0.024761699089	1664	0.024834987806	1664	0.024834870303	1664	1.120796E-05	1664	-1.1634431E-05	1664	-2.350308E-05	1664	0.015675381261	1664	0.015658734806	1664	0.015703017815	1664	0.024813236876	1664	0.024856747106	1664	0.024882000548	1664	-3.6803463E-05
1662	2.039129E-05	1662	-3.8678051E-05	1662	-7.23312E-06	1662	0.026952844087	1662	0.02699416265	1662	0.026989676732	1662	-5.5093178E-05	1662	4.815484E-06	1662	-1.615236E-06	1662	0.016583600373	1662	0.016556017905	1662	0.016584477608	1662	0.026946935138	1662	0.026956706692	1662	0.027013930814	1662	-1.311741E-05	1662	-9.547357E-06	1662	3.316799E-06	1662	0.016493803856	1662	0.016520554522	1662	0.016544796928	1662	0.026936594926	1662	0.02698269726	1662	0.026977147163	1662	-4.2076155E-05
1661	3.2083874E-05	1661	-5.643055E-06	1661	-1.8686828E-05	1661	0.027987383028	1661	0.02798113565	1661	0.028005793994	1661	-2.3189513E-05	1661	6.365311E-06	1661	6.320365E-06	1661	0.016947565622	1661	0.01697203642	1661	0.016986070387	1661	0.0279745031	1661	0.027994111631	1661	0.028031732862	1661	-3.0722249E-05	1661	-8.253717E-06	1661	-1.343521E-05	1661	0.016923013134	1661	0.016924262802	1661	0.016973910216	1661	0.02800486327	1661	0.028007962773	1661	0.027979600674	1661	-4.112871E-05
1660	2.485337E-05	1660	-7.5416E-08	1660	3.5348409E-05	1660	0.02895331353	1660	0.028965712592	1660	0.028971069337	1660	-3.2160871E-05	1660	-1.2390359E-05	1660	-3.5159726E-05	1660	0.017343379581	1660	0.01737268191	1660	0.017375038964	1660	0.028913490482	1660	0.028946645228	1660	0.028994518206	1660	-7.1119022E-05	1660	-5.5258276E-05	1660	2.953894E-06	1660	0.017407939097	1660	0.01739613306	1660	0.017423396518	1660	0.028953118191	1660	0.029013468009	1660	0.028965232242	1660	-2.1662728E-05
1659	1.7737247E-05	1659	-5.191059E-06	1659	-1.854756E-06	1659	0.029902374702	1659	0.029931922512	1659	0.029928131767	1659	-5.7326093E-05	1659	-2.428946E-05	1659	1.0570199E-05	1659	0.017758223194	1659	0.017773668749	1659	0.017809319126	1659	0.029894739658	1659	0.029914360212	1659	0.029922771187	1659	-4.4645425E-05	1659	-1.3105113E-05	1659	-4.2385776E-05	1659	0.01782354003	1659	0.017849061083	1659	0.017825671925	1659	0.029899636777	1659	0.029953517823	1659	0.029920688921	1659	-2.2320474E-05
1658	3.5978843E-05	1658	2.7668506E-05	1658	2.8862579E-05	1658	0.030777927405	1658	0.030804129245	1658	0.030821817686	1658	-4.2162424E-05	1658	-6.378867E-06	1658	-2.1264139E-05	1658	0.018145351698	1658	0.018144022626	1658	0.018150569503	1658	0.030794401768	1658	0.030790973546	1658	0.030805554512	1658	-7.858205E-05	1658	-2.2743817E-05	1658	8.367369E-06	1658	0.018260525271	1658	0.018311025304	1658	0.018294976509	1658	0.030804070981	1658	0.030820805992	1658	0.030809506123	1658	-4.4835931E-05
1657	4.5247657E-05	1657	-9.17426E-07	1657	-1.5068854E-05	1657	0.031568136794	1657	0.03158358032	1657	0.031601512531	1657	-3.8343751E-05	1657	-4.4008097E-05	1657	-6.971859E-06	1657	0.018529153367	1657	0.018541578528	1657	0.018578661917	1657	0.03158169188	1657	0.031572668284	1657	0.031597834638	1657	-5.6507613E-05	1657	-6.982371E-06	1657	-4.4670513E-05	1657	0.018709147877	1657	0.018727881073	1657	0.018746412097	1657	0.031612404855	1657	0.031625637436	1657	0.03157656995	1657	-7.1780925E-05
1656	4.3622358E-05	1656	1.2026407E-05	1656	1.0416855E-05	1656	0.032317616875	1656	0.032360552815	1656	0.032427923424	1656	-3.9437425E-05	1656	-4.7676429E-05	1656	-5.39292E-06	1656	0.01891138307	1656	0.018954640455	1656	0.018929682714	1656	0.032346116556	1656	0.032376005814	1656	0.0324051037	1656	-4.8521376E-05	1656	-4.7206022E-05	1656	-1.1886373E-05	1656	0.019208956275	1656	0.019218890795	1656	0.01921303272	1656	0.032372627749	1656	0.032351033636	1656	0.03242300691	1656	-4.7336773E-05
1651	4.0454844E-05	1651	2.3279383E-05	1651	9.76944E-06	1651	0.034904000874	1651	0.034907111531	1651	0.034960155066	1651	-1.7313539E-05	1651	-1.9297528E-05	1651	-4.4368852E-05	1651	0.020290208203	1651	0.020325372314	1651	0.020314633753	1651	0.034916841607	1651	0.034926931809	1651	0.034951495956	1651	-4.6300565E-05	1651	-3.4261585E-05	1651	-1.1068132E-05	1651	0.021124563684	1651	0.021105629006	1651	0.021137773768	1651	0.034914631386	1651	0.034954207127	1651	0.034940978341	1651	-5.6396167E-05
1650	1.8840429E-05	1650	1.3247516E-05	1650	6.47522E-07	1650	0.035153656457	1650	0.035164216924	1650	0.035171418908	1650	-1.0526311E-05	1650	-2.4827787E-05	1650	-3.1672608E-05	1650	0.02043550171	1650	0.020494117247	1650	0.020527623703	1650	0.035172731467	1650	0.035142902984	1650	0.035160835703	1650	-4.2842509E-05	1650	-2.9457441E-05	1650	-4.266098E-06	1650	0.021350854518	1650	0.021353364806	1650	0.021353473984	1650	0.035110659627	1650	0.035183269629	1650	0.035170851447	1650	-5.8608917E-05
1649	2.2596979E-05	1649	-1.3127809E-05	1649	2.3216744E-05	1649	0.035307320495	1649	0.035328907902	1649	0.035349171682	1649	-2.0380852E-05	1649	-6.8220568E-05	1649	-3.1232591E-05	1649	0.020601885606	1649	0.020657415358	1649	0.02066515404	1649	0.035335550016	1649	0.035326222323	1649	0.035360354709	1649	-6.7927912E-05	1649	-3.8531016E-05	1649	-1.5496674E-05	1649	0.021538487066	1649	0.021550264488	1649	0.021578395176	1649	0.035323830339	1649	0.035357248767	1649	0.035338802138	1649	-5.5703713E-05
1645	3.0326674E-05	1645	-4.749298E-06	1645	1.5048928E-05	1645	0.035376873297	1645	0.035392436974	1645	0.035407365626	1645	-4.9207233E-05	1645	-5.6505403E-05	1645	-5.2266016E-05	1645	0.021062178792	1645	0.021075040396	1645	0.021115445361	1645	0.035403067527	1645	0.035389122579	1645	0.03538506929	1645	-6.7033902E-05	1645	-1.861241E-05	1645	-1.6110997E-05	1645	0.02189132511	1645	0.021912175472	1645	0.021913638796	1645	0.035360387048	1645	0.035400369766	1645	0.035390195048	1645	-7.7755232E-05
1644	6.728163E-06	1644	3.3162586E-05	1644	1.2870316E-05	1644	0.035136464583	1644	0.03515614605	1644	0.035122147473	1644	-2.4147986E-05	1644	-4.1537725E-05	1644	-2.662394E-05	1644	0.021156102026	1644	0.021190226885	1644	0.021191129846	1644	0.035105495309	1644	0.035148426221	1644	0.035147122969	1644	-5.1579861E-05	1644	-3.7577697E-05	1644	-2.24415E-05	1644	0.021945078748	1644	0.021952253928	1644	0.021984525747	1644	0.035155407696	1644	0.035163967493	1644	0.035151970188	1644	-4.0971902E-05
1643	-4.754016E-06	1643	-4.94551E-07	1643	1.9396186E-05	1643	0.034868067699	1643	0.034860793868	1643	0.03488952648	1643	-3.3705689E-05	1643	-5.2140505E-05	1643	-1.212605E-05	1643	0.021259816848	1643	0.021303279638	1643	0.021296154297	1643	0.034816237168	1643	0.034863823434	1643	0.034871905371	1643	-5.9251858E-05	1643	-5.4284838E-05	1643	-2.797645E-06	1643	0.022069700686	1643	0.022046934967	1643	0.022062470511	1643	0.034834699515	1643	0.034877981721	1643	0.034842571927	1643	-5.5047503E-05
1642	2.1016247E-05	1642	2.1653992E-05	1642	2.0258673E-05	1642	0.034449500221	1642	0.034483971858	1642	0.034448925447	1642	-1.828365E-05	1642	-3.4165475E-05	1642	-2.6874564E-05	1642	0.021358763368	1642	0.021386059638	1642	0.021396259422	1642	0.034435219592	1642	0.034477498864	1642	0.034459591181	1642	-8.9625953E-05	1642	-4.0128949E-05	1642	-2.6617145E-05	1642	0.022113119886	1642	0.02214312387	1642	0.022150891747	1642	0.034430168232	1642	0.034444836687	1642	0.034404684655	1642	-6.0393751E-05
1641	3.5825233E-05	1641	3.798281E-06	1641	-1.2995862E-05	1641	0.033987005802	1641	0.033989252893	1641	0.033988118118	1641	-1.3597701E-05	1641	-3.2827662E-05	1641	2.6147941E-05	1641	0.021463201769	1641	0.021523225584	1641	0.02152949379	1641	0.033924365749	1641	0.033958120633	1641	0.033966842211	1641	-7.2728424E-05	1641	-4.5592137E-05	1641	-3.9783888E-05	1641	0.022203470222	1641	0.022257257695	1641	0.022256770478	1641	0.033942091041	1641	0.033954910346	1641	0.033977022994	1641	-5.154468E-05
1640	1.9361654E-05	1640	-6.605736E-06	1640	3.0912632E-05	1640	0.03343408905	1640	0.033461073187	1640	0.033469709832	1640	-3.2558931E-05	1640	-4.742361E-05	1640	-1.6752016E-05	1640	0.021587516658	1640	0.021625822866	1640	0.021636587762	1640	0.033433181541	1640	0.033413693781	1640	0.033467439972	1640	-4.3473702E-05	1640	-3.5048503E-05	1640	-2.4183404E-05	1640	0.0223195024	1640	0.022350037783	1640	0.022351270998	1640	0.033427818781	1640	0.033478122507	1640	0.033434557976	1640	-6.7035112E-05
1639	9.730354E-06	1639	1.3210925E-05	1639	3.0905772E-05	1639	0.032880975814	1639	0.03293293353	1639	0.03290783602	1639	-1.9977049E-05	1639	-4.0783072E-05	1639	-2.9520753E-05	1639	0.021619842023	1639	0.021678419683	1639	0.021666770078	1639	0.032879178011	1639	0.032878286061	1639	0.032906169319	1639	-4.0391625E-05	1639	-4.0535637E-05	1639	-1.7910666E-05	1639	0.022364555321	1639	0.022406742248	1639	0.022397584106	1639	0.032869924419	1639	0.032923343649	1639	0.032875250414	1639	-8.2175043E-05
1638	8.049799E-06	1638	-8.399289E-06	1638	4.0591238E-05	1638	0.032185467706	1638	0.03222128224	1638	0.032213898464	1638	-4.2935107E-05	1638	-1.3505911E-05	1638	-2.3505022E-05	1638	0.0216019549	1638	0.021636199102	1638	0.021651297346	1638	0.032187329234	1638	0.032185516549	1638	0.0322391456	1638	-4.2222809E-05	1638	-6.8339354E-05	1638	-4.3378257E-05	1638	0.022377249102	1638	0.022404308226	1638	0.022396911902	1638	0.032184770747	1638	0.032191762774	1638	0.032176626117	1638	-4.3441656E-05
1634	-1.1036051E-05	1634	-3.5485699E-05	1634	3.6128967E-05	1634	0.029075296775	1634	0.02911814545	1634	0.029162191776	1634	-3.0912254E-05	1634	-3.0785187E-05	1634	-1.6782902E-05	1634	0.021240257603	1634	0.021297207019	1634	0.02133439522	1634	0.029064020566	1634	0.029010332035	1634	0.029124011757	1634	-7.1693137E-05	1634	-1.1091974E-05	1634	-3.4927068E-05	1634	0.022210099901	1634	0.022241154366	1634	0.022252335665	1634	0.029096192079	1634	0.029136684616	1634	0.029065756904	1634	-6.1826506E-05
1633	7.458875E-06	1633	8.233716E-06	1633	1.9527337E-05	1633	0.028242010897	1633	0.028243647494	1633	0.028295241671	1633	-1.2958707E-05	1633	-3.2007655E-05	1633	-2.4634397E-05	1633	0.021153199434	1633	0.021202625379	1633	0.021201668207	1633	0.028198976343	1633	0.028231051855	1633	0.028251014574	1633	-3.3162362E-05	1633	-4.9394492E-05	1633	-3.1920556E-05	1633	0.022120809034	1633	0.022162970524	1633	0.022164731488	1633	0.028205601406	1633	0.028300397679	1633	0.02821559348	1633	-2.6908134E-05
1632	2.0594153E-05	1632	7.1168027E-05	1632	5.6233295E-05	1632	0.027362267864	1632	0.02739299106	1632	0.027377807616	1632	-2.8384494E-05	1632	-4.2060028E-05	1632	1.147953E-05	1632	0.020999025861	1632	0.021055217604	1632	0.021068838801	1632	0.027316870879	1632	0.027270791045	1632	0.027297778514	1632	-3.8022722E-05	1632	-4.0889186E-05	1632	-1.2117145E-05	1632	0.021987583271	1632	0.022036923286	1632	0.022046458158	1632	0.027210222632	1632	0.027249114384	1632	0.027218177434	1632	-8.053492E-05
1631	4.0724238E-05	1631	-1.047578E-06	1631	3.952713E-06	1631	0.026361936753	1631	0.026370043965	1631	0.026371326491	1631	2.330619E-06	1631	-4.2421463E-05	1631	-2.0106957E-05	1631	0.020844730704	1631	0.020887662127	1631	0.020872990356	1631	0.026322618518	1631	0.026267905452	1631	0.026321891944	1631	-3.0283468E-05	1631	1.248192E-06	1631	-1.8294024E-05	1631	0.021773519282	1631	0.021837280776	1631	0.021844506454	1631	0.026305244672	1631	0.026293137061	1631	0.026268287044	1631	-4.2017135E-05
1630	3.8535202E-05	1630	-7.815353E-06	1630	3.535209E-06	1630	0.025408176948	1630	0.025405054856	1630	0.025399908727	1630	6.268723E-06	1630	-4.7487371E-05	1630	-5.3623498E-05	1630	0.020632175818	1630	0.020656200325	1630	0.020718527644	1630	0.025314584991	1630	0.025306203137	1630	0.025363738385	1630	-2.8049736E-05	1630	-3.71882E-06	1630	-1.8836492E-05	1630	0.021596127136	1630	0.021612032369	1630	0.021648403753	1630	0.025346379362	1630	0.025331436514	1630	0.025276221569	1630	-6.5033781E-05
1629	5.0096431E-05	1629	5.475311E-06	1629	1.7991333E-05	1629	0.024311863393	1629	0.024260050908	1629	0.024319236255	1629	-5.60224E-07	1629	-1.3963767E-05	1629	-4.2387874E-05	1629	0.020346631881	1629	0.020372832109	1629	0.020375294964	1629	0.024244805926	1629	0.024235714171	1629	0.024180419313	1629	-7.065473E-05	1629	-4.8913021E-05	1629	-2.3484975E-05	1629	0.021262373084	1629	0.021259336197	1629	0.021297721607	1629	0.024199173583	1629	0.024223703984	1629	0.024217723246	1629	-1.9458143E-05
1627	1.6715197E-05	1627	1.3501538E-05	1627	1.7787086E-05	1627	0.021886614138	1627	0.02210699267	1627	0.021948737296	1627	-5.0520687E-05	1627	-4.6688667E-05	1627	-4.1409826E-05	1627	0.019512847955	1627	0.019557131278	1627	0.019650608198	1627	0.02201290659	1627	0.021910615411	1627	0.021923617385	1627	-7.7797075E-05	1627	-3.2027066E-05	1627	-1.2075225E-05	1627	0.020442725262	1627	0.020401673176	1627	0.020514596833	1627	0.021908387908	1627	0.02192330744	1627	0.021828528322	1627	-7.5090463E-05
1626	-3.9957582E-05	1626	1.9119722E-05	1626	3.9321502E-05	1626	0.020855226358	1626	0.020855900456	1626	0.020859244013	1626	-3.3752443E-05	1626	-7.280854E-06	1626	-1.9053529E-05	1626	0.01911362414	1626	0.019146154225	1626	0.019202137653	1626	0.020816599626	1626	0.020805315615	1626	0.020871903161	1626	2.636948E-06	1626	1.8453448E-05	1626	-1.3930479E-05	1626	0.019908526926	1626	0.019877528524	1626	0.019922207539	1626	0.020821991497	1626	0.020795599033	1626	0.020729075249	1626	-8.4455426E-05
1625	2.7268774E-05	1625	5.500119E-06	1625	-1.3019748E-05	1625	0.019856320033	1625	0.01981518587	1625	0.019781222831	1625	1.9040118E-05	1625	-2.2284312E-05	1625	-2.8700328E-05	1625	0.018608591778	1625	0.018715475737	1625	0.018717529576	1625	0.019597362812	1625	0.0196300131	1625	0.019688281768	1625	6.196768E-06	1625	4.262968E-05	1625	-4.5454777E-05	1625	0.019322439428	1625	0.019318293762	1625	0.019371884492	1625	0.01970163507	1625	0.019652241898	1625	0.019663834463	1625	-3.7462185E-05
1622	1.5928112E-05	1622	-1.7182729E-05	1622	9.416316E-06	1622	0.016341962508	1622	0.016362591359	1622	0.016275797705	1622	1.1196651E-05	1622	5.661747E-06	1622	-2.7979358E-05	1622	0.01666743864	1622	0.016684513824	1622	0.016696888671	1622	0.016173718572	1622	0.016231051363	1622	0.016242738747	1622	-2.5374296E-05	1622	-3.2165462E-05	1622	-1.37808E-06	1622	0.017110938224	1622	0.017151440197	1622	0.017223539611	1622	0.016211440627	1622	0.016206001821	1622	0.016177026975	1622	-5.1587754E-05
1621	4.1172817E-05	1621	2.5848295E-05	1621	1.8322192E-05	1621	0.015170698975	1621	0.015128772375	1621	0.015209276688	1621	3.711689E-05	1621	1.0598832E-05	1621	-2.1368753E-05	1621	0.015942313597	1621	0.015960099263	1621	0.015960603857	1621	0.015142975119	1621	0.015120196104	1621	0.015059467759	1621	1.3418358E-05	1621	-1.6824988E-05	1621	-2.4100976E-05	1621	0.016244367357	1621	0.016337463565	1621	0.016293744996	1621	0.015038217629	1621	0.015154196791	1621	0.015094341345	1621	-1.563586E-05
1620	2.0657477E-05	1620	-1.7166227E-05	1620	3.9572415E-05	1620	0.013969970416	1620	0.013982009828	1620	0.014088063946	1620	-2.4644629E-05	1620	-6.0816E-06	1620	-3.3675604E-05	1620	0.015117795669	1620	0.015126027474	1620	0.015176865749	1620	0.014052310387	1620	0.013997817498	1620	0.014009397766	1620	-1.7262855E-05	1620	-1.1252521E-05	1620	-4.2328441E-05	1620	0.015440774641	1620	0.015458231339	1620	0.015543798988	1620	0.013947998728	1620	0.014014007211	1620	0.013951259956	1620	-3.0820989E-05
1619	-9.540101E-06	1619	7.64527E-07	1619	2.1982205E-05	1619	0.012925731327	1619	0.013024024721	1619	0.012964157796	1619	-5.2669877E-05	1619	-2.1442384E-05	1619	-2.1934081E-05	1619	0.014219622278	1619	0.014309730999	1619	0.014296558184	1619	0.012833935461	1619	0.012919015435	1619	0.012903309978	1619	1.5072839E-05	1619	8.21331E-07	1619	-3.3804708E-05	1619	0.014519024691	1619	0.014565278254	1619	0.01467241287	1619	0.012877004422	1619	0.012860679061	1619	0.012840195556	1619	-3.8664857E-05
1618	1.6306511E-05	1618	-2.0675616E-05	1618	3.639868E-06	1618	0.011782184105	1618	0.011803844287	1618	0.011760951462	1618	-1.5192824E-05	1618	-2.4696698E-05	1618	-4.0228983E-05	1618	0.013431539548	1618	0.013478110989	1618	0.013458111803	1618	0.011708673186	1618	0.011680769479	1618	0.01173392043	1618	-6.4665051E-05	1618	-3.5681337E-05	1618	-9.787167E-06	1618	0.013676530187	1618	0.013672005984	1618	0.013745250896	1618	0.011754603019	1618	0.011775223679	1618	0.011752506292	1618	-3.0086651E-05
1615	7.5429158E-05	1615	9.03612E-07	1615	2.2021337E-05	1615	0.008500734698	1615	0.008450745935	1615	0.008565803662	1615	-1.0743431E-05	1615	-1.8319911E-05	1615	-9.446678E-06	1615	0.010863780012	1615	0.010888543602	1615	0.010921658712	1615	0.008340458946	1615	0.008411174586	1615	0.008370339715	1615	1.2917996E-05	1615	2.1721994E-05	1615	-3.0898429E-05	1615	0.010969439554	1615	0.011017647509	1615	0.01109524141	1615	0.008342937386	1615	0.008367006989	1615	0.008344640329	1615	-5.0692561E-05
1614	1.3329581E-05	1614	1.2370635E-05	1614	2.0049661E-05	1614	0.007494507246	1614	0.007553761435	1614	0.007503262266	1614	2.1475032E-05	1614	2.570661E-05	1614	-2.7714715E-05	1614	0.010153797734	1614	0.01022350906	1614	0.010233411358	1614	0.007361303823	1614	0.007413806648	1614	0.007426257389	1614	4.643912E-06	1614	1.4099273E-05	1614	-9.349854E-06	1614	0.01032247715	1614	0.010259811896	1614	0.010325536438	1614	0.007410768859	1614	0.007361089823	1614	0.007406559065	1614	-3.9246653E-05
1613	1.718031E-05	1613	2.0940391E-05	1613	3.4510214E-05	1613	0.006481798258	1613	0.006425249749	1613	0.006485856182	1613	-9.118563E-06	1613	-2.2089756E-05	1613	-2.760962E-06	1613	0.009462472639	1613	0.009492757153	1613	0.009539612579	1613	0.00638848179	1613	0.006387601409	1613	0.006388803212	1613	-1.3318015E-05	1613	-3.2000854E-05	1613	-1.293613E-06	1613	0.0095345236	1613	0.009594784106	1613	0.009576241823	1613	0.006334197396	1613	0.006322406478	1613	0.006291949394	1613	-3.694546E-06
1612	4.1867574E-05	1612	-4.3023848E-05	1612	-4.867049E-06	1612	0.005459664889	1612	0.005549946704	1612	0.00547354238	1612	2.693953E-06	1612	-2.8359424E-05	1612	-1.1622553E-05	1612	0.008810998709	1612	0.008844772395	1612	0.008870837759	1612	0.005459500832	1612	0.00545306852	1612	0.005391195033	1612	1.840265E-05	1612	-2.8137449E-05	1612	-8.239298E-06	1612	0.008873186061	1612	0.008920376291	1612	0.008978412137	1612	0.005398951228	1612	0.005420660442	1612	0.005321073787	1612	-2.7708251E-05
1611	1.9406566E-05	1611	-9.835557E-06	1611	5.6601709E-05	1611	0.0046384904	1611	0.00460712756	1611	0.004563435307	1611	-1.5326142E-05	1611	-1.9447078E-05	1611	1.678138E-06	1611	0.008273562146	1611	0.008282848479	1611	0.008338983169	1611	0.004480485136	1611	0.004510063553	1611	0.0044469157	1611	-3.667118E-06	1611	5.678831E-06	1611	5.657675E-06	1611	0.008325285149	1611	0.008364715688	1611	0.008363977596	1611	0.004386004201	1611	0.004422758316	1611	0.004387951812	1611	1.156762E-05
1610	-3.1763481E-05	1610	-4.146459E-05	1610	3.605651E-06	1610	0.003644398109	1610	0.003638956977	1610	0.003597342009	1610	3.1898795E-05	1610	-5.1864573E-05	1610	-2.2100271E-05	1610	0.007775769085	1610	0.007793307587	1610	0.00778869002	1610	0.00360212229	1610	0.003544632809	1610	0.003553005362	1610	1.105901E-05	1610	-1.2736788E-05	1610	7.17608E-07	1610	0.007854598188	1610	0.007839166128	1610	0.007878326627	1610	0.003505347112	1610	0.00348644607	1610	0.003511941753	1610	1.8717847E-05
1609	2.0614546E-05	1609	3.6298207E-05	1609	1.2002758E-05	1609	0.002755692094	1609	0.00273788051	1609	0.002790481511	1609	8.79789E-06	1609	2.072825E-06	1609	-2.1648397E-05	1609	0.007288935431	1609	0.007368287752	1609	0.007371447265	1609	0.002640935237	1609	0.002593151115	1609	0.00268812877	1609	-5.4671176E-05	1609	5.1485768E-05	1609	2.1221361E-05	1609	0.007394157185	1609	0.007414094477	1609	0.007428617424	1609	0.002608249464	1609	0.002584107231	1609	0.002548485276	1609	-5.1297632E-05
1608	3.36457E-06	1608	1.7279692E-05	1608	2.8330432E-05	1608	0.00187027108	1608	0.001878951742	1608	0.001949749062	1608	-2.8826976E-05	1608	3.267971E-06	1608	1.1015973E-05	1608	0.00689302649	1608	0.006993693952	1608	0.006931871809	1608	0.001805112199	1608	0.00183469622	1608	0.001891760948	1608	-1.5616623E-05	1608	-3.2093267E-05	1608	-2.131001E-05	1608	0.006969895405	1608	0.006982667374	1608	0.006962698006	1608	0.001804332213	1608	0.001786470123	1608	0.001777369943	1608	-8.9897E-06
1607	6.7431355E-05	1607	2.0981627E-05	1607	-4.2738513E-05	1607	0.001146106073	1607	0.001152512476	1607	0.001139639718	1607	1.9639533E-05	1607	1.7447502E-05	1607	-6.2174E-06	1607	0.006556225279	1607	0.00662960084	1607	0.006609326527	1607	0.001047055599	1607	0.001042926335	1607	0.001126912868	1607	7.687268E-06	1607	-1.2636839E-05	1607	-2.91671E-07	1607	0.006635949559	1607	0.006644921314	1607	0.006696967308	1607	0.001018335606	1607	0.001019246834	1607	0.001047748265	1607	-1.3606675E-05
1606	8.2251172E-05	1606	3.634844E-05	1606	2.322417E-05	1606	0.000405630184	1606	0.000407853929	1606	0.000398740525	1606	-3.4604594E-05	1606	-5.54594E-06	1606	-9.509535E-06	1606	0.006525179746	1606	0.006496763368	1606	0.006470369639	1606	0.0003250355	1606	0.000308445235	1606	0.000337443201	1606	-1.7243502E-05	1606	3.700563E-06	1606	3.3727561E-05	1606	0.00648164254	1606	0.006529204163	1606	0.00652485299	1606	0.000262100091	1606	0.000338170489	1606	0.000277948498	1606	-2.9105937E-05
1605	3.6523683E-05	1605	1.099758E-05	1605	4.3717196E-05	1605	-0.000359830105	1605	-0.000339909353	1605	-0.000248047736	1605	2.3310926E-05	1605	5.4916022E-05	1605	1.3738947E-05	1605	0.006681446246	1605	0.006672299756	1605	0.006625598218	1605	-0.000424956285	1605	-0.000438398695	1605	-0.000396851996	1605	2.3148283E-05	1605	3.1838385E-05	1605	-1.9394954E-05	1605	0.00674653673	1605	0.00671186479	1605	0.006692627347	1605	-0.000464875901	1605	-0.000416536208	1605	-0.000429334485	1605	-1.4979457E-05
1604	3.8245664E-05	1604	2.3028055E-05	1604	9.525903E-06	1604	-0.001057859324	1604	-0.001067523161	1604	-0.001002699511	1604	1.5064255E-05	1604	3.8574286E-05	1604	-3.9208009E-05	1604	0.006360236889	1604	0.006406691251	1604	0.006412225239	1604	-0.001176544918	1604	-0.0011410208	1604	-0.001215826696	1604	3.424226E-05	1604	-2.1158723E-05	1604	2.0312001E-05	1604	0.006501161703	1604	0.006507658926	1604	0.006491336015	1604	-0.001225709469	1604	-0.001224324335	1604	-0.001202928294	1604	1.6439971E-05
1603	2.1626114E-05	1603	2.0936385E-05	1603	1.6771285E-05	1603	-0.001766279182	1603	-0.001732026424	1603	-0.001760759866	1603	1.7205414E-05	1603	9.427376E-06	1603	-4.0928309E-05	1603	0.006219072868	1603	0.006231991322	1603	0.006221474669	1603	-0.001858816545	1603	-0.001838645328	1603	-0.001877086107	1603	5.013593E-06	1603	2.3535111E-05	1603	3.1369771E-05	1603	0.006275088675	1603	0.006296235867	1603	0.006245429858	1603	-0.001900018819	1603	-0.001914398812	1603	-0.001905836399	1603	1.3655676E-05
1602	-4.0153479E-05	1602	2.7198561E-05	1602	5.746327E-06	1602	-0.002432092991	1602	-0.002441089888	1602	-0.002473833662	1602	2.1849965E-05	1602	-3.00878E-06	1602	-4.9418668E-05	1602	0.00606245131	1602	0.006082107165	1602	0.006060617384	1602	-0.002504953425	1602	-0.002566557737	1602	-0.00251602498	1602	2.2587175E-05	1602	-1.3196434E-05	1602	-4.2055521E-05	1602	0.006132574375	1602	0.006133980639	1602	0.006084451594	1602	-0.002577825874	1602	-0.002561531182	1602	-0.002553096055	1602	3.6897306E-05
1601	-3.1527422E-05	1601	5.9089569E-05	1601	-1.5045134E-05	1601	-0.003015912182	1601	-0.003068592133	1601	-0.003010823385	1601	2.8877541E-05	1601	5.933142E-06	1601	-4.8988467E-05	1601	0.005941564656	1601	0.00592910534	1601	0.005966448865	1601	-0.003120387793	1601	-0.00314385819	1601	-0.003176006327	1601	-1.4260713E-05	1601	2.4074351E-05	1601	2.8771117E-05	1601	0.006004499416	1601	0.006063349088	1601	0.005953191224	1601	-0.003233637678	1601	-0.003202617549	1601	-0.003237138686	1601	1.5008574E-05
1600	-1.722054E-06	1600	8.4886579E-05	1600	-1.2692388E-05	1600	-0.003673986113	1600	-0.003609248584	1600	-0.003669395121	1600	2.0647512E-05	1600	-1.1753566E-05	1600	-2.105797E-05	1600	0.005809595741	1600	0.005859514843	1600	0.005831869732	1600	-0.003733824917	1600	-0.003679548265	1600	-0.003817761554	1600	-4.887815E-06	1600	3.2746863E-05	1600	1.560649E-05	1600	0.005864997842	1600	0.005912623083	1600	0.005863546	1600	-0.003774002378	1600	-0.003822487464	1600	-0.003763904289	1600	8.713808E-06
1599	3.2856634E-05	1599	1.3894803E-05	1599	-2.3792351E-05	1599	-0.004229587235	1599	-0.004253411178	1599	-0.004244183672	1599	-5.776546E-06	1599	-2.3171111E-05	1599	-1.668341E-05	1599	0.005680067864	1599	0.00576594188	1599	0.005692358446	1599	-0.004280175575	1599	-0.00430119046	1599	-0.004318191194	1599	2.38332E-06	1599	2.8611998E-05	1599	-1.1659527E-05	1599	0.005787169416	1599	0.005819920258	1599	0.005774180665	1599	-0.004392867051	1599	-0.004353470581	1599	-0.004368695349	1599	3.4269537E-05
1598	-3.2061689E-05	1598	2.1234861E-05	1598	1.2952781E-05	1598	-0.004756449253	1598	-0.004714809933	1598	-0.004810797347	1598	-1.411875E-06	1598	3.3888428E-05	1598	1.96459E-06	1598	0.005656566677	1598	0.005713269407	1598	0.005653592902	1598	-0.004844274479	1598	-0.004830438559	1598	-0.004885618225	1598	-1.0519258E-05	1598	-2.067431E-05	1598	4.398936E-06	1598	0.005729362887	1598	0.00574531892	1598	0.005782806535	1598	-0.004918000843	1598	-0.004927418656	1598	-0.004899936972	1598	1.0681551E-05
1597	1.6883146E-05	1597	6.1272946E-05	1597	-2.8315007E-05	1597	-0.005250079239	1597	-0.005200190682	1597	-0.005203710594	1597	3.7244586E-05	1597	2.6790752E-05	1597	-3.4447298E-05	1597	0.005629418869	1597	0.005678848349	1597	0.00564301502	1597	-0.005303783643	1597	-0.005303552787	1597	-0.005314916133	1597	1.061725E-05	1597	-5.4912585E-05	1597	2.1611893E-05	1597	0.005767154863	1597	0.005750379356	1597	0.005725367204	1597	-0.005375418636	1597	-0.005349527411	1597	-0.005413691635	1597	3.5977012E-05
1596	3.3294542E-05	1596	2.1938512E-05	1596	5.4357978E-05	1596	-0.005648808482	1596	-0.005697643509	1596	-0.005681513822	1596	4.386219E-06	1596	3.0918806E-05	1596	-5.227646E-06	1596	0.00563459684	1596	0.005659119706	1596	0.00562837709	1596	-0.005748513875	1596	-0.005768499249	1596	-0.005796798406	1596	2.787258E-05	1596	-7.993298E-06	1596	4.5048367E-05	1596	0.005747068808	1596	0.005764648816	1596	0.005692357137	1596	-0.005814752164	1596	-0.00581202909	1596	-0.005818319909	1596	6.6293902E-05
1595	4.00026E-05	1595	3.680304E-05	1595	5.753099E-06	1595	-0.006123686098	1595	-0.006117696155	1595	-0.00612558561	1595	-7.880605E-06	1595	-1.3882475E-05	1595	-5.3580472E-05	1595	0.005685242796	1595	0.005747952362	1595	0.005707466108	1595	-0.006187861604	1595	-0.006191294548	1595	-0.006237223623	1595	-2.401795E-05	1595	1.2117362E-05	1595	5.291863E-05	1595	0.00577358968	1595	0.005802334188	1595	0.005741881343	1595	-0.006223305791	1595	-0.006258151028	1595	-0.00626455519	1595	6.0069128E-05
1594	4.0548585E-05	1594	4.0425646E-05	1594	-3.2344026E-05	1594	-0.006528131533	1594	-0.006544082101	1594	-0.006536873383	1594	2.428977E-05	1594	-2.3681993E-05	1594	-1.0562958E-05	1594	0.00576988665	1594	0.00572347903	1594	0.005711958109	1594	-0.006579209071	1594	-0.006553225249	1594	-0.006647968464	1594	2.9104122E-05	1594	2.1633282E-05	1594	2.0503645E-05	1594	0.005791214201	1594	0.005824676413	1594	0.005829795954	1594	-0.00667888207	1594	-0.006633238543	1594	-0.006679699379	1594	5.78275E-05
1593	1.3816536E-05	1593	5.8546359E-05	1593	-3.0396588E-05	1593	-0.00687968617	1593	-0.006861786408	1593	-0.006834581149	1593	-2.4400146E-05	1593	5.4524012E-05	1593	2.2980383E-05	1593	0.005817596984	1593	0.005801907614	1593	0.005815928779	1593	-0.006958899065	1593	-0.006943530239	1593	-0.007009449563	1593	2.7104292E-05	1593	2.0539257E-05	1593	3.4506698E-05	1593	0.005894955879	1593	0.005904727564	1593	0.005931234483	1593	-0.007017270667	1593	-0.007021834137	1593	-0.007010826869	1593	-2.240395E-06
1592	2.9629117E-05	1592	1.3878952E-05	1592	4.6538436E-05	1592	-0.007252207688	1592	-0.007223942437	1592	-0.007253675084	1592	-1.8377464E-05	1592	-1.4389599E-05	1592	-1.3264766E-05	1592	0.005937594684	1592	0.005923257873	1592	0.005910699283	1592	-0.007244892996	1592	-0.007274190851	1592	-0.00728491864	1592	1.4337712E-05	1592	-2.0142332E-05	1592	4.4300688E-05	1592	0.006042037671	1592	0.006004141716	1592	0.006035361092	1592	-0.007328652577	1592	-0.007311398806	1592	-0.007351359944	1592	6.4055751E-05
1591	1.8823158E-05	1591	3.5506904E-05	1591	-3.1779184E-05	1591	-0.007550298323	1591	-0.007562472475	1591	-0.007508894992	1591	2.2876284E-05	1591	3.5064331E-05	1591	1.3977191E-05	1591	0.006020804679	1591	0.006055795997	1591	0.006028873739	1591	-0.007631583378	1591	-0.007588628688	1591	-0.007661669087	1591	1.6650635E-05	1591	9.671779E-06	1591	2.9935417E-05	1591	0.006117509409	1591	0.006154817212	1591	0.006149001879	1591	-0.00769425956	1591	-0.007692854802	1591	-0.007716720537	1591	5.3633974E-05
1590	1.7757046E-05	1590	3.4352962E-05	1590	8.6410899E-05	1590	-0.007893225361	1590	-0.007831776884	1590	-0.007820015017	1590	8.635211E-06	1590	-1.864512E-06	1590	-2.771776E-06	1590	0.006224141039	1590	0.006223077964	1590	0.006182625907	1590	-0.007893284913	1590	-0.007931577082	1590	-0.007946187197	1590	-1.0234453E-05	1590	-7.265137E-06	1590	4.7935776E-05	1590	0.006280311141	1590	0.006282334836	1590	0.006284512684	1590	-0.007947224544	1590	-0.007948982226	1590	-0.00797547684	1590	-8.3806E-07
1589	1.6830349E-05	1589	-9.484311E-06	1589	8.829643E-06	1589	-0.008122312313	1589	-0.008082873126	1589	-0.008126791088	1589	2.9362254E-05	1589	-1.7608665E-05	1589	5.873E-06	1589	0.00638484338	1589	0.006322770861	1589	0.006351084743	1589	-0.008190818744	1589	-0.008160829078	1589	-0.008194143163	1589	4.0906252E-05	1589	1.6910371E-05	1589	3.8391402E-05	1589	0.006422970126	1589	0.00642459802	1589	0.006456675696	1589	-0.008239245112	1589	-0.00824117108	1589	-0.008274749499	1589	1.8298852E-05
1588	2.5107741E-05	1588	2.4816523E-05	1588	5.0942306E-05	1588	-0.008318542582	1588	-0.008288876623	1588	-0.008291372417	1588	6.899094E-06	1588	1.3578876E-05	1588	-1.270207E-06	1588	0.006469537164	1588	0.006510184798	1588	0.006514886529	1588	-0.008347101644	1588	-0.008349731273	1588	-0.008360871754	1588	3.4776069E-05	1588	3.0849285E-05	1588	4.9339348E-05	1588	0.00656857204	1588	0.006582519039	1588	0.006564743189	1588	-0.008397448342	1588	-0.008420798579	1588	-0.008409179211	1588	5.1156599E-05
[truncated: 10 more columns]
